# Supplementary material for: Synthesis of lutein esters using a novel biocatalyst of Candida antarctica lipase B covalently immobilized on functionalized graphitic carbon nitride nanosheets
Source: Royal Society of Chemistry journal article supplement (doi:10.1039/d0ra00563k), 2020-01-01
Supplement: d0ra00563k1.pdf [file d0ra00563k1.pdf]

## Supplementary information

### **Synthesis of lutein esters using novel biocatalyst of *Candida antarctica* lipase B covalently immobilized on functionalized graphitic carbon nitride nanosheets**

Huijuan Shangguan,<sup>a</sup> Shan Zhang,<sup>a</sup> Xin Li,<sup>a</sup> Qi Zhou,<sup>a</sup> Jie Shi,<sup>\*a,b</sup> Qianchun Deng <sup>a</sup> and Fenghong Huang <sup>a</sup>

<sup>a</sup> Hubei Key Laboratory of Lipid Chemistry and Nutrition, Key Laboratory of Oilseeds Processing, Ministry of Agriculture and Rural Affairs, Oil Crops Research Institute, Chinese Academy of Agricultural Sciences, Wuhan 430062, China.

<sup>b</sup> School of Food and Biological Engineering, Hefei University of Technology, Hefei 230009, China.

Corresponding Author: [shijie@caas.cn](mailto:shijie@caas.cn)

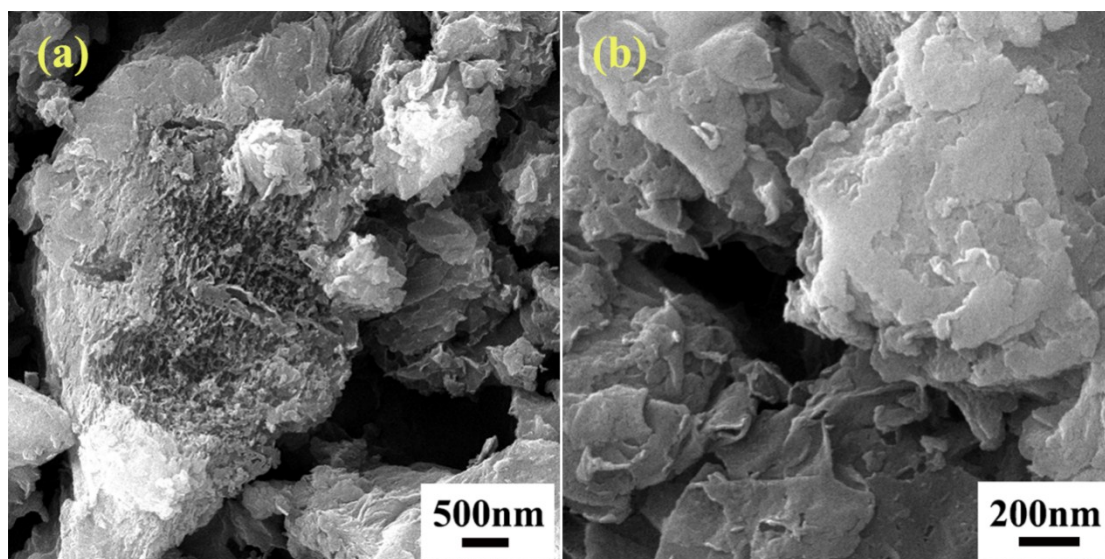

**Fig. S1.** SEM images of bulk g-C<sub>3</sub>N<sub>4</sub> (a) and g-C<sub>3</sub>N<sub>4</sub>-Ns (b).

**Table S1.** The surface area, pore width and pore volume of samples.

| Samples                                         | Surface area<br>(m <sup>2</sup> g <sup>-1</sup> ) | Pore width<br>(nm) | Pore volume<br>(cc g <sup>-1</sup> ) |
|-------------------------------------------------|---------------------------------------------------|--------------------|--------------------------------------|
| g-C <sub>3</sub> N <sub>4</sub> -Ns             | 118.858                                           | 3.794              | 0.444                                |
| g-C <sub>3</sub> N <sub>4</sub> -Ns-PEI         | 54.005                                            | 3.058              | 0.332                                |
| g-C <sub>3</sub> N <sub>4</sub> -Ns-PEI-GA      | 26.947                                            | 3.060              | 0.232                                |
| g-C <sub>3</sub> N <sub>4</sub> -Ns-PEI-GA@CALB | 14.163                                            | 2.897              | 0.178                                |

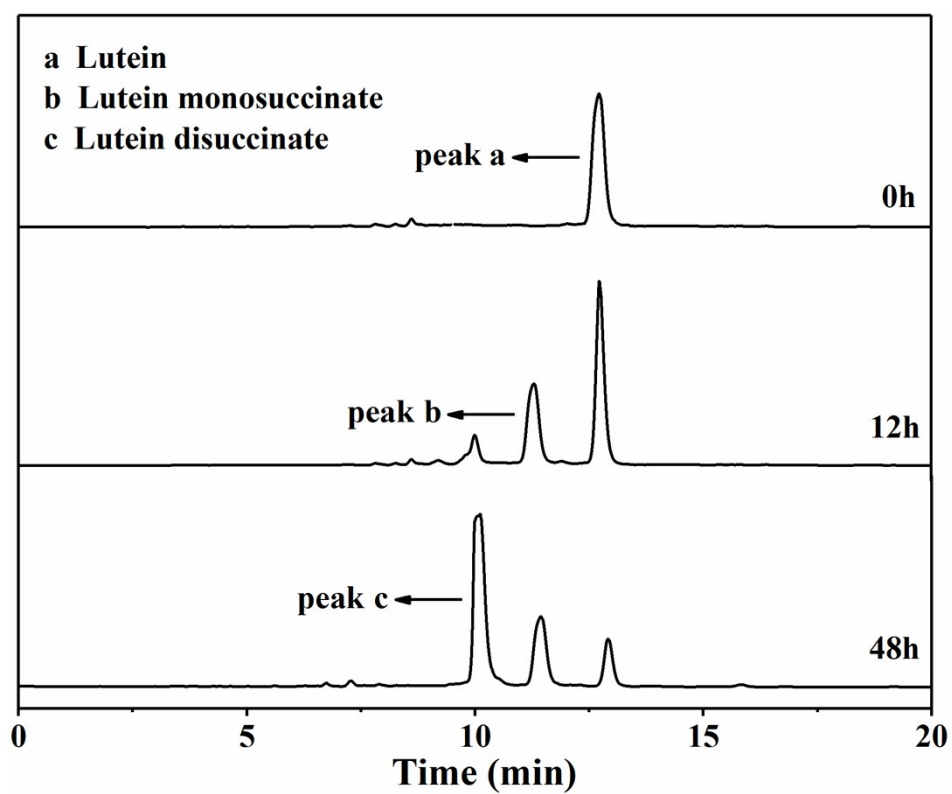

**Fig. S2.** Liquid chromatography spectra of lutein and lutein esters products.

**Table S2.** Effect of different organic solvents on the lutein disuccinate conversion rate at 45 °C in 48 h.

| Solvent         | Conversion rate (%) |
|-----------------|---------------------|
| Acetone         | 7.12                |
| Acetonitrile    | 14.58               |
| Chloroform      | 56.46               |
| DMF             | 64.32               |
| DMSO            | 42.07               |
| Hexyl alcohol   | 0                   |
| MTBE            | 34.06               |
| N-butyl alcohol | 0                   |
| Toluene         | 47.72               |
